# Supplementary material for: Regularities of Changes in the Structure of Different Phases of Deformed Zirconium Alloys as a Result of Raising the Annealing Temperature According to Texture Analysis Data
Source: MDPI journal article supplement (doi:10.3390/met13101784), 2023-10-21
Supplement: s1 [file s1]

Archive with 1 entries (1 files):
- metals-2638375-supplementary.pdf
