# Supplementary material for: Regularities of Changes in the Structure of Different Phases of Deformed Zirconium Alloys as a Result of Raising the Annealing Temperature According to Texture Analysis Data
Source: MDPI journal article supplement (doi:10.3390/met13101784), 2023-10-21
Supplement: s1 [file s1 › metals-2638375-supplementary.pdf]

## Supplementary Materials

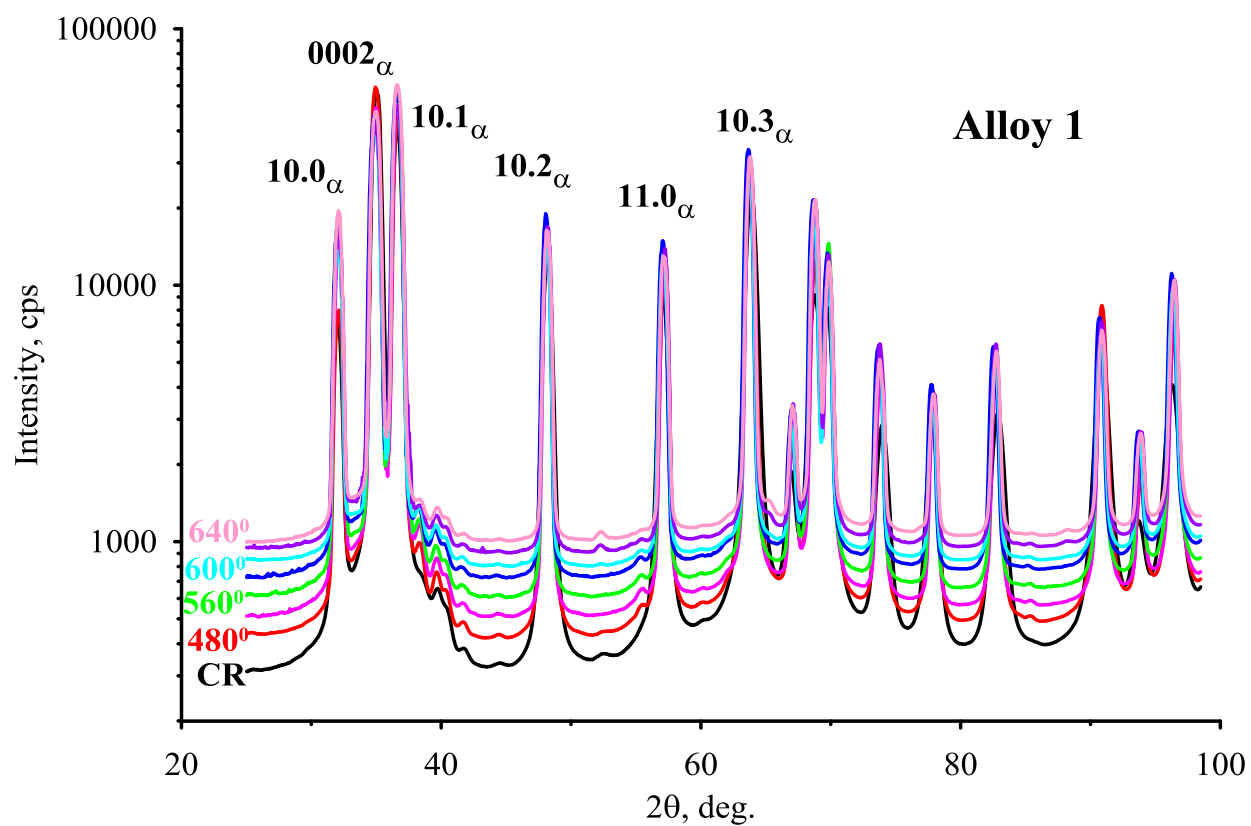

**Figure S1.** Diffraction patterns of the studied samples of Alloy 1 in the cold-rolled (CR) and annealed states

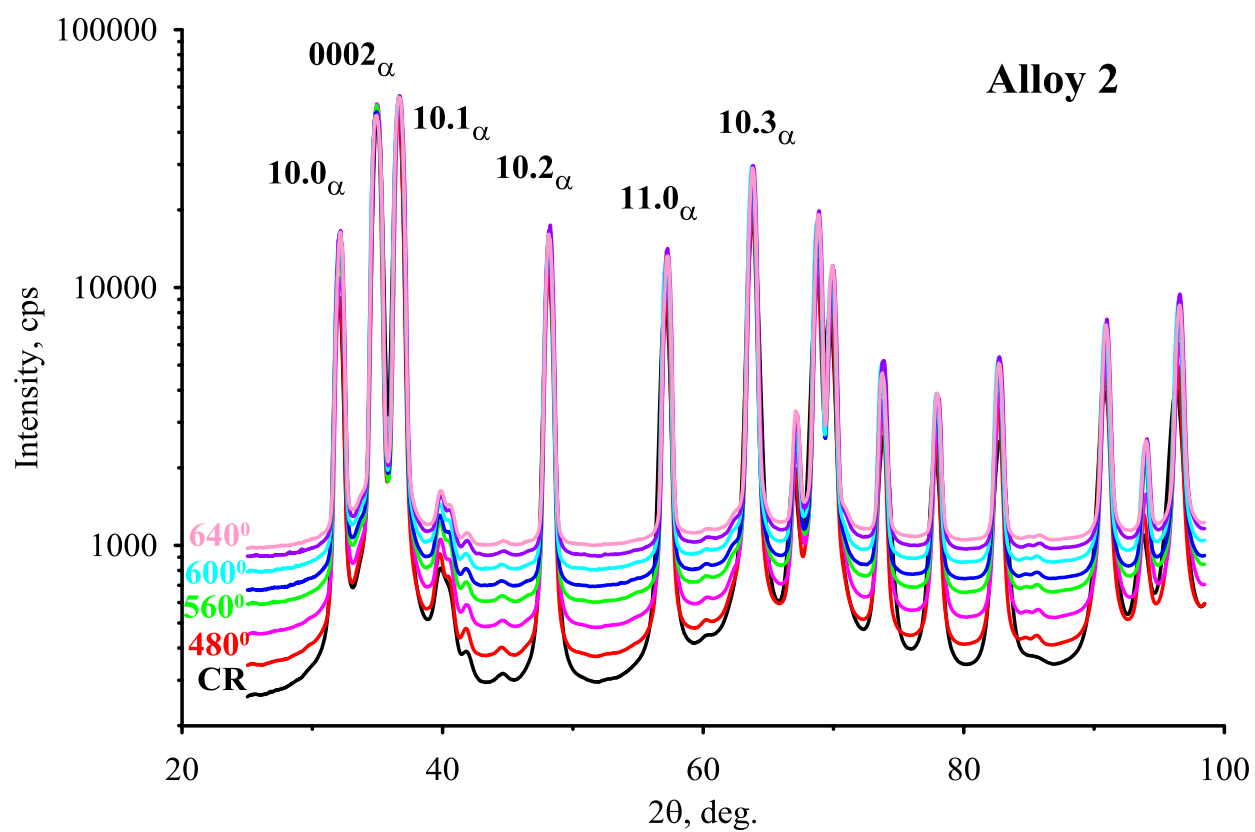

**Figure S2.** Diffraction patterns of the studied samples of Alloy 2 in the cold-rolled (CR) and annealed states

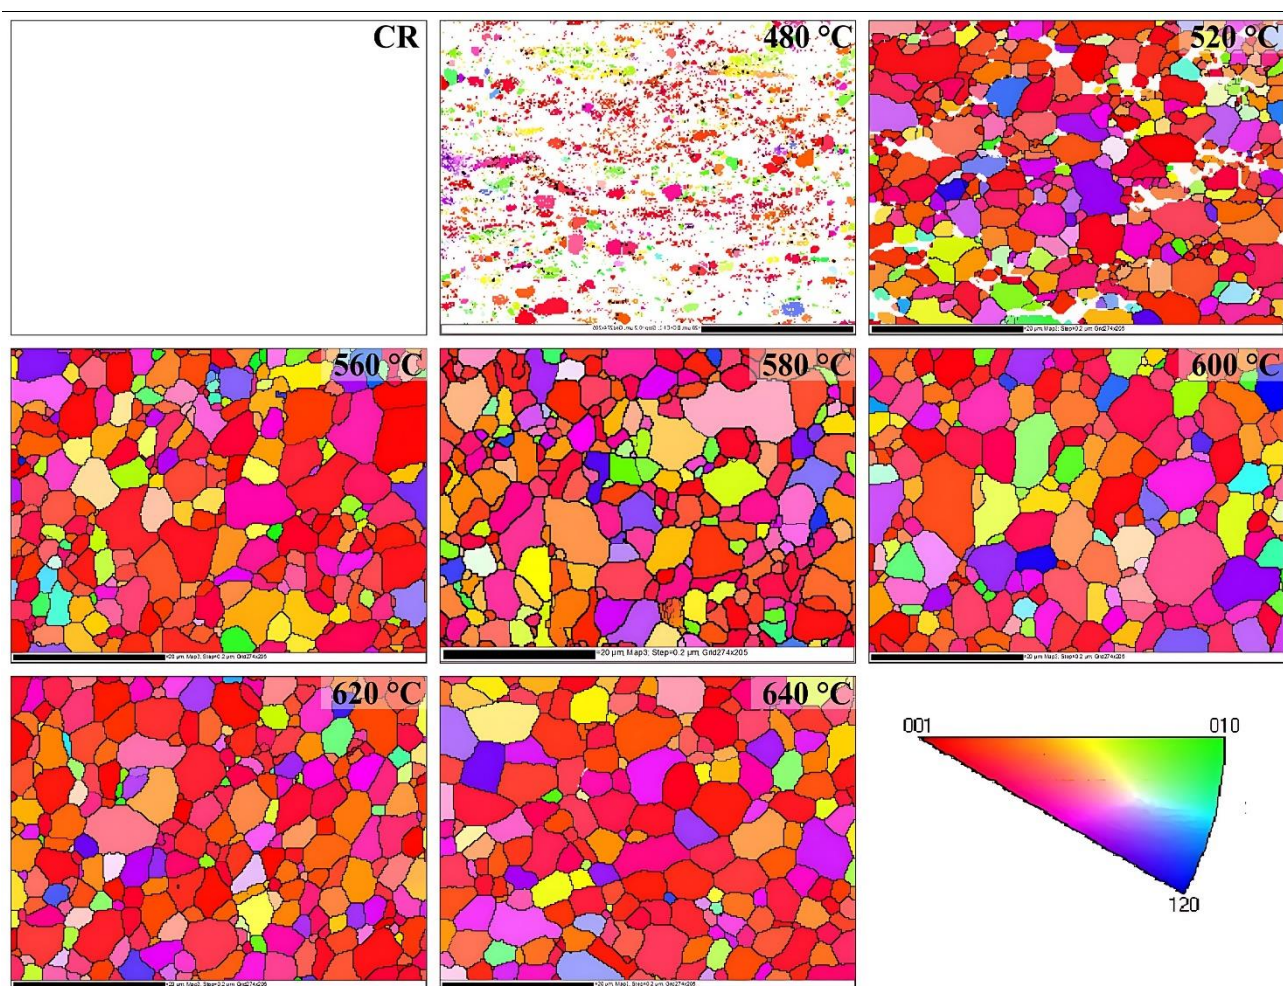

**Figure S3.** EBSD-maps of studied samples Alloy 1 for CR and annealed states. The annealing temperature is indicated on each map.

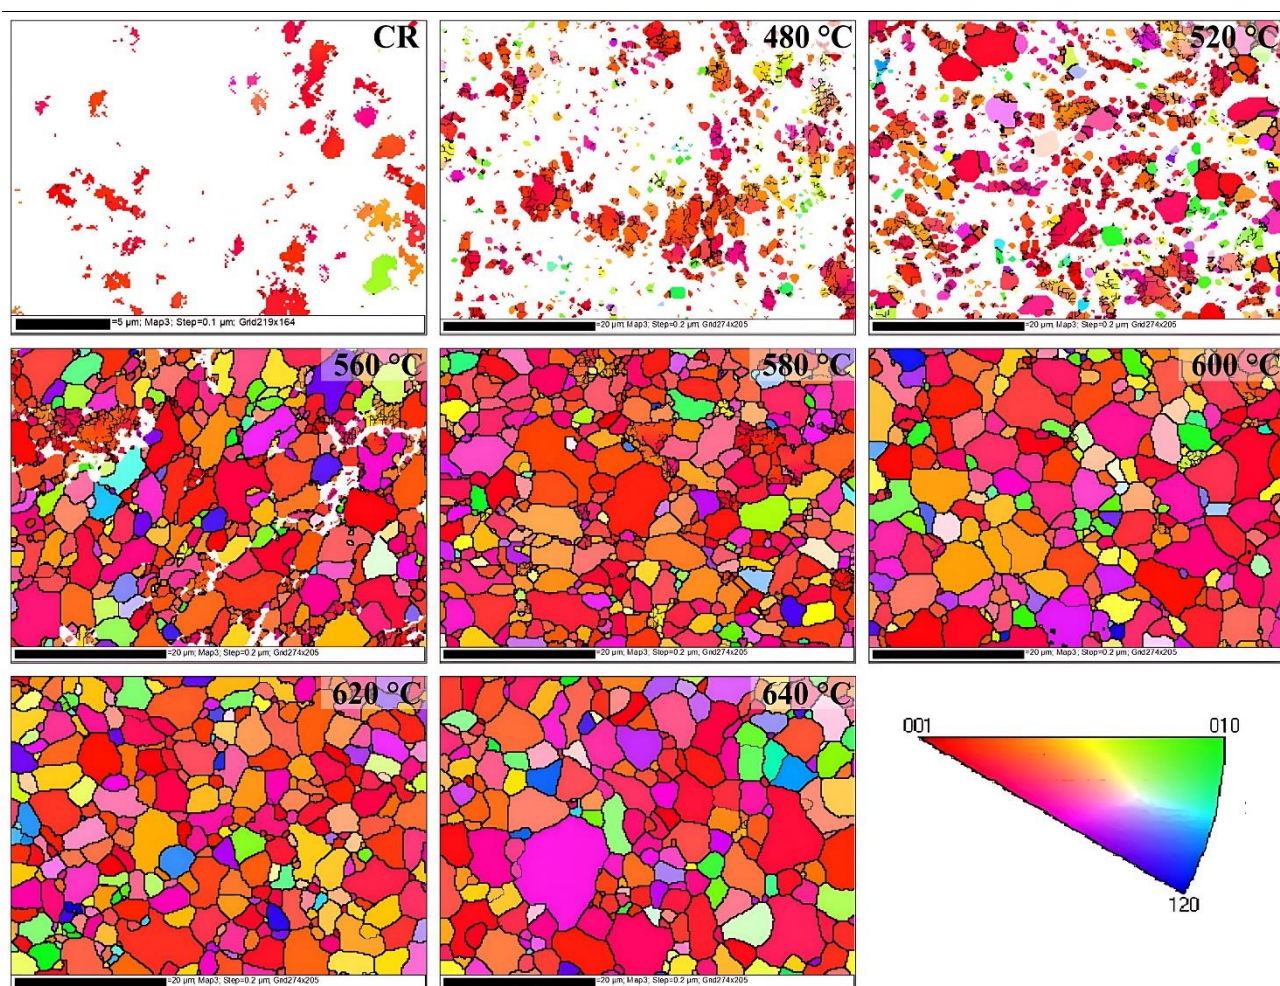

**Figure S4.** EBSD-maps of studied samples Alloy 2 for CR and annealed states. The annealing temperature is indicated on each map.
